# Supplementary material for: Longitudinal trajectories of branched chain amino acids through young adulthood and diabetes in later life
Source: JCI journal article supplement (doi:10.1172/jci.insight.166956), 2023-04-23
Supplement: sd1 [file 1]

# **SUPPLEMENTAL MATERIAL**

## SUPPLEMENTAL TABLES

**Supplemental Table 1. Baseline characteristics at Year 2 examination stratified by quartile of initial BCAA measurement.**

|                                                | Quartile 1<br>(n=777) | Quartile 2<br>(n=778) | Quartile 3<br>(n=778) | Quartile 4<br>(n=778) | Total<br>(n=3,111) |
|------------------------------------------------|-----------------------|-----------------------|-----------------------|-----------------------|--------------------|
| BCAA levels, $\mu\text{mol/L}$ , mean $\pm$ SD |                       |                       |                       |                       |                    |
| Year 2 Examination                             | 284.4 (33.0)          | 348.5 (13.5)          | 395.9 (14.8)          | 473.5 (52.7)          | 369.3 (75.6)       |
| Year 7 Examination                             | 362.4 (65.3)          | 393.4 (65.7)          | 420.9 (66.8)          | 475.0 (76.1)          | 413.4 (80.1)       |
| Year 15 Examination                            | 355.0 (63.8)          | 377.8 (67.8)          | 400.0 (67.6)          | 436.6 (77.5)          | 392.8 (75.6)       |
| Year 20 Examination                            | 359.2 (66.1)          | 384.5 (73.1)          | 406.2 (70.5)          | 438.5 (76.2)          | 397.0 (77.2)       |
| Age, years, mean $\pm$ SD                      | 27.1 (3.6)            | 27.1 (3.6)            | 27.3 (3.4)            | 27.1 (3.6)            | 27.2 (3.6)         |
| Men, n (%)                                     | 169 (21.8%)           | 284 (36.5%)           | 396 (50.9%)           | 527 (67.7%)           | 1376 (44.2%)       |
| Black, n (%)                                   | 346 (44.5%)           | 335 (43.1%)           | 338 (43.4%)           | 372 (47.8%)           | 1391 (44.7%)       |
| Education, years, mean $\pm$ SD                | 14.3 (2.3)            | 14.5 (2.3)            | 14.5 (2.3)            | 14.4 (2.5)            | 14.4 (2.3)         |
| Total cholesterol, mg/dL, mean $\pm$ SD        | 172.8 (32.4)          | 176.6 (32.3)          | 179.6 (33.5)          | 181.4 (34.3)          | 177.6 (33.3)       |
| LDL-C, mg/dL, mean $\pm$ SD                    | 106.7 (30.8)          | 111.9 (31.3)          | 116.0 (32.6)          | 117.9 (34.3)          | 113.1 (32.5)       |
| HDL-C, mg/dL, mean $\pm$ SD                    | 56.5 (13.7)           | 54.8 (13.1)           | 52.1 (13.6)           | 49.4 (12.8)           | 53.2 (13.6)        |
| Triglycerides, mg/dL, mean $\pm$ SD            | 68.7 (39.0)           | 70.9 (42.3)           | 79.6 (46.2)           | 93.6 (75.6)           | 78.1 (53.5)        |
| BMI, $\text{kg/m}^2$ , mean $\pm$ SD           | 23.6 (4.6)            | 24.4 (4.6)            | 25.4 (5.0)            | 26.9 (5.6)            | 25.1 (5.1)         |
| Fasting blood glucose, mg/dL, mean $\pm$ SD    | 81.0 (9.5)            | 84.3 (11.5)           | 86.0 (13.1)           | 91.3 (20.4)           | 85.3 (14.3)        |
| Systolic blood pressure, mmHg, mean $\pm$ SD   | 104.7 (9.8)           | 106.1 (10.6)          | 108.5 (10.1)          | 111.1 (10.5)          | 107.6 (10.6)       |
| Diastolic blood pressure, mmHg, mean $\pm$ SD  | 65.7 (8.8)            | 66.3 (9.1)            | 68.1 (9.1)            | 69.9 (9.4)            | 67.5 (9.2)         |
| Physical activity score, mean $\pm$ SD         | 360.5 (285.9)         | 377.7 (270.0)         | 392.0 (297.1)         | 412.3 (294.7)         | 385.5 (287.6)      |
| Healthy Eating Index, mean $\pm$ SD            | 63.3 (9.7)            | 63.3 (9.3)            | 61.5 (9.5)            | 60.9 (8.9)            | 62.2 (9.4)         |
| Smoking status                                 |                       |                       |                       |                       |                    |
| Former, n (%)                                  | 115 (15.0%)           | 121 (16.0%)           | 105 (13.9%)           | 96 (12.7%)            | 437 (14.4%)        |
| Current, n (%)                                 | 199 (25.9%)           | 179 (23.7%)           | 192 (25.4%)           | 198 (26.3%)           | 768 (25.3%)        |
| Never, n (%)                                   | 463 (59.6%)           | 478 (61.4%)           | 481 (61.8%)           | 484 (62.2%)           | 1906 (61.3%)       |
| Alcohol use                                    |                       |                       |                       |                       |                    |
| Heavy, n (%)                                   | 73 (11.2%)            | 92 (14.3%)            | 113 (17.2%)           | 100 (15.6%)           | 378 (14.6%)        |
| Moderate, n (%)                                | 359 (55.1%)           | 368 (57.1%)           | 385 (58.7%)           | 368 (57.3%)           | 1480 (57.0%)       |
| Never, n (%)                                   | 345 (44.4%)           | 318 (40.9%)           | 280 (36.0%)           | 310 (39.8%)           | 1253 (40.3%)       |
| Anti-hypertensive medication, n (%)            | 12 (1.6%)             | 17 (2.2%)             | 22 (2.9%)             | 27 (3.6%)             | 78 (2.6%)          |
| Prevalent diabetes at Year 2 Exam, n (%)       | 5 (0.7%)              | 6 (0.8%)              | 5 (0.7%)              | 13 (1.7%)             | 29 (1.0%)          |
| Prevalent diabetes at Year 30 Exam, n (%)      | 60 (10%)              | 89 (13.5%)            | 106 (16.4%)           | 167 (25.5%)           | 422 (16.5%)        |

Abbreviations: BCAA, branched chain amino acid; BMI, body mass index; LDL-C, low-density lipoprotein cholesterol; HDL-C, high-density lipoprotein cholesterol; SD, standard deviation.

**Supplemental Table 2. Baseline characteristics at Year 2 examination stratified by sex  
across quartile of initial BCAA measurement.**

|                                                | Quartile 1   | Quartile 2   | Quartile 3   | Quartile 4   | Total        |
|------------------------------------------------|--------------|--------------|--------------|--------------|--------------|
| BCAA levels, $\mu\text{mol/L}$ , mean $\pm$ SD |              |              |              |              |              |
| Year 2 Examination                             |              |              |              |              |              |
| Women                                          | 281.0 (34.3) | 347.8 (13.3) | 394.5 (15.0) | 462.7 (45.5) | 340.5 (66.5) |
| Men                                            | 295.0 (26.1) | 349.5 (13.6) | 396.8 (14.7) | 477.0 (54.5) | 398.7 (72.9) |
| Year 7 Examination                             |              |              |              |              |              |
| Women                                          | 351.2 (62.4) | 374.0 (56.1) | 394.1 (52.4) | 455.0 (73.4) | 382.9 (69.3) |
| Men                                            | 402.2 (60.1) | 426.7 (67.8) | 447.1 (69.0) | 484.9 (75.5) | 451.8 (76.1) |
| Year 15 Examination                            |              |              |              |              |              |
| Women                                          | 342.7 (56.7) | 358.3 (58.2) | 377.2 (61.1) | 412.8 (79.3) | 365.4 (66.2) |
| Men                                            | 397.3 (68.6) | 411.8 (70.0) | 422.8 (66.1) | 448.2 (74.0) | 427.2 (72.5) |
| Year 20 Examination                            |              |              |              |              |              |
| Women                                          | 346.3 (57.7) | 365.7 (61.4) | 376.9 (58.9) | 402.0 (70.3) | 366.5 (63.7) |
| Men                                            | 406.4 (73.4) | 417.5 (80.2) | 434.8 (69.1) | 456.1 (72.7) | 435.9 (75.6) |
| Age, years, mean $\pm$ SD                      |              |              |              |              |              |
| Women                                          | 27.2 (3.7)   | 27.1 (3.6)   | 27.1 (3.5)   | 27.0 (3.7)   | 27.1 (3.6)   |
| Men                                            | 26.9 (3.5)   | 27.2 (3.6)   | 27.4 (3.3)   | 27.2 (3.6)   | 27.2 (3.5)   |
| Sex, n (%)                                     |              |              |              |              |              |
| Women                                          | 608 (35.0%)  | 494 (28.5%)  | 382 (22.0%)  | 251 (14.5%)  | 1735 (100%)  |
| Men                                            | 169 (12.3%)  | 284 (20.6%)  | 396 (28.8%)  | 527 (38.3%)  | 1376 (100%)  |
| Black, n (%)                                   |              |              |              |              |              |
| Women                                          | 275 (45.2%)  | 229 (46.4%)  | 189 (49.5%)  | 143 (57.0%)  | 836 (48.2%)  |
| Men                                            | 71 (42.0%)   | 106 (37.3%)  | 149 (37.6%)  | 229 (43.5%)  | 555 (40.3%)  |
| Education, years, mean $\pm$ SD                |              |              |              |              |              |
| Women                                          | 14.4 (2.2)   | 14.5 (2.1)   | 14.4 (2.3)   | 14.2 (2.2)   | 14.4 (2.2)   |
| Men                                            | 14.1 (2.4)   | 14.5 (2.6)   | 14.5 (2.3)   | 14.5 (2.6)   | 14.5 (2.5)   |
| Total cholesterol, mg/dL, mean $\pm$ SD        |              |              |              |              |              |
| Women                                          | 173.5 (31.5) | 178.2 (30.7) | 178.2 (30.7) | 179.7 (34.4) | 179.2 (30.5) |
| Men                                            | 170.6 (35.5) | 173.9 (34.8) | 179.5 (32.6) | 182.4 (35.9) | 178.3 (34.9) |
| LDL-C, mg/dL, mean $\pm$ SD                    |              |              |              |              |              |
| Women                                          | 106.1 (29.6) | 111.7 (29.7) | 113.9 (33.4) | 113.9 (30.8) | 110.5 (30.8) |
| Men                                            | 108.9 (35.0) | 112.1 (33.8) | 118.0 (31.8) | 119.8 (35.6) | 116.3 (34.3) |
| HDL-C, mg/dL, mean $\pm$ SD                    |              |              |              |              |              |
| Women                                          | 58.0 (13.7)  | 57.2 (13.2)  | 55.9 (13.6)  | 53.5 (12.0)  | 56.7 (13.4)  |
| Men                                            | 51.0 (12.1)  | 50.9 (12.0)  | 48.6 (12.6)  | 47.5 (12.7)  | 49.0 (12.5)  |
| Triglycerides, mg/dL, mean $\pm$ SD            |              |              |              |              |              |
| Women                                          | 67.1 (36.1)  | 67.9 (38.0)  | 71.5 (38.8)  | 81.3 (82.2)  | 70.3 (46.6)  |
| Men                                            | 74.5 (47.4)  | 76.0 (48.3)  | 87.2 (51.0)  | 99.3 (71.7)  | 87.9 (59.6)  |
| BMI, $\text{kg/m}^2$ , mean $\pm$ SD           |              |              |              |              |              |
| Women                                          | 23.8 (4.9)   | 24.5 (5.2)   | 25.9 (6.1)   | 27.6 (6.9)   | 25.0 (5.7)   |
| Men                                            | 23.2 (2.9)   | 24.3 (3.3)   | 25.0 (3.8)   | 26.5 (4.8)   | 25.2 (4.2)   |
| Fasting blood glucose, mg/dL, mean $\pm$ SD    |              |              |              |              |              |
| Women                                          | 80.5 (9.7)   | 83.4 (12.7)  | 86.0 (17.4)  | 93.6 (28.6)  | 83.7 (15.6)  |
| Men                                            | 82.8 (8.9)   | 85.4 (9.8)   | 85.9 (9.4)   | 90.6 (16.9)  | 86.9 (12.7)  |
| Systolic blood pressure, mmHg, mean $\pm$ SD   |              |              |              |              |              |
| Women                                          | 103.0 (9.2)  | 102.9 (9.3)  | 104.6 (9.3)  | 106.6 (9.6)  | 103.8 (9.4)  |
| Men                                            | 110.9 (9.6)  | 111.5 (10.6) | 112.3 (9.3)  | 113.3 (10.3) | 112.3 (10.0) |
| Diastolic blood pressure, mmHg, mean $\pm$ SD  |              |              |              |              |              |
| Women                                          | 65.0 (8.6)   | 64.8 (8.7)   | 65.8 (9.3)   | 67.8 (9.0)   | 65.5 (8.9)   |

|                                           |               |               |               |               |               |
|-------------------------------------------|---------------|---------------|---------------|---------------|---------------|
| Men                                       | 68.6 (8.8)    | 69.0 (9.3)    | 70.2 (8.4)    | 70.9 (9.4)    | 70.0 (9.0)    |
| Physical activity score, mean $\pm$ SD    |               |               |               |               |               |
| Women                                     | 308.7 (241.9) | 323.3 (232.2) | 298.2 (240.1) | 276.2 (228.0) | 305.9 (237.1) |
| Men                                       | 545.1 (348.4) | 471.3 (303.5) | 482.1 (318.3) | 477.1 (300.9) | 485.9 (313.2) |
| Healthy Eating Index, mean $\pm$ SD       |               |               |               |               |               |
| Women                                     | 63.7 (9.8)    | 64.3 (9.2)    | 62.8 (9.6)    | 62.6 (9.1)    | 63.5 (9.5)    |
| Men                                       | 61.8 (9.1)    | 61.5 (9.4)    | 60.2 (9.3)    | 60.2 (8.8)    | 60.6 (9.1)    |
| Smoking status                            |               |               |               |               |               |
| Former, n (%)                             |               |               |               |               |               |
| Women                                     | 98 (16.3%)    | 76 (16.0%)    | 55 (14.9%)    | 36 (14.7%)    | 265 (15.7%)   |
| Men                                       | 17 (10.2%)    | 45 (16.2%)    | 50 (12.9%)    | 60 (11.8%)    | 172 (12.8%)   |
| Current, n (%)                            |               |               |               |               |               |
| Women                                     | 150 (25.0%)   | 105 (22.1%)   | 92 (24.9%)    | 67 (27.3%)    | 414 (24.5%)   |
| Men                                       | 49 (29.3%)    | 74 (26.6%)    | 100 (25.8%)   | 131 (25.8%)   | 354 (26.4%)   |
| Never, n (%)                              |               |               |               |               |               |
| Women                                     | 353 (58.7%)   | 295 (62.0%)   | 223 (60.3%)   | 142 (58.0%)   | 1013 (59.9%)  |
| Men                                       | 101 (60.5%)   | 159 (57.2%)   | 237 (61.2%)   | 317 (62.4%)   | 814 (60.7%)   |
| Alcohol use                               |               |               |               |               |               |
| Heavy, n (%)                              |               |               |               |               |               |
| Women                                     | 61 (12.2%)    | 54 (13.5%)    | 56 (18.4%)    | 31 (15.5%)    | 202 (14.4%)   |
| Men                                       | 12 (7.9%)     | 38 (15.5%)    | 57 (16.2%)    | 69 (15.6%)    | 176 (14.8%)   |
| Moderate, n (%)                           |               |               |               |               |               |
| Women                                     | 250 (49.9%)   | 207 (51.8%)   | 142 (46.7%)   | 85 (42.5%)    | 684 (48.7%)   |
| Men                                       | 109 (72.2%)   | 161 (65.7%)   | 243 (69.0%)   | 283 (64.0%)   | 796 (66.9%)   |
| Never, n (%)                              |               |               |               |               |               |
| Women                                     | 190 (37.9%)   | 139 (34.8%)   | 106 (34.9%)   | 84 (42.0%)    | 519 (36.9%)   |
| Men                                       | 30 (19.9%)    | 46 (18.8%)    | 52 (14.8%)    | 90 (20.4%)    | 218 (18.3%)   |
| Anti-hypertensive medication, n (%)       |               |               |               |               |               |
| Women                                     | 12 (2.0%)     | 12 (2.5%)     | 12 (3.2%)     | 10 (4.1%)     | 46 (2.7%)     |
| Men                                       | 0 (0.0%)      | 5 (1.8%)      | 10 (2.6%)     | 17 (3.3%)     | 32 (2.4%)     |
| Prevalent diabetes at Year 2 Exam, n (%)  |               |               |               |               |               |
| Women                                     | 2 (0.3%)      | 1 (0.2%)      | 4 (1.1%)      | 5 (2.0%)      | 12 (0.7%)     |
| Men                                       | 1 (0.6%)      | 2 (0.7%)      | 0 (0.0%)      | 2 (0.4%)      | 5 (0.4%)      |
| Prevalent diabetes at Year 30 Exam, n (%) |               |               |               |               |               |
| Women                                     | 44 (9.4%)     | 55 (13.1%)    | 55 (17.5%)    | 59 (27.7%)    | 213 (15.1%)   |
| Men                                       | 16 (11.9%)    | 34 (14.4%)    | 51 (15.3%)    | 108 (24.4%)   | 209 (18.2%)   |

Abbreviations: BCAA, branched chain amino acid; BMI, body mass index; LDL-C, low-density lipoprotein cholesterol; HDL-C, high-density lipoprotein cholesterol; SD, standard deviation.

**Supplemental Table 3. Clinical characteristics at Year 2 Examination by study inclusion status.**

|                                               | <b>Excluded<br/>(n=2,031)</b> | <b>Included<br/>(n=3,081)</b> |
|-----------------------------------------------|-------------------------------|-------------------------------|
| Age, years, mean $\pm$ SD                     | 26.6 (3.7)                    | 27.1 (3.6)                    |
| Men, n (%)                                    | 963 (47.4%)                   | 1364 (44.3%)                  |
| Black, n (%)                                  | 1262 (62.1%)                  | 1375 (44.6%)                  |
| Education, years, mean $\pm$ SD               | 13.7 (3.8)                    | 14.4 (2.3)                    |
| Systolic blood pressure, mmHg, mean $\pm$ SD  | 108.4 (11.2)                  | 107.6 (10.6)                  |
| Diastolic blood pressure, mmHg, mean $\pm$ SD | 67.3 (10.5)                   | 67.5 (9.2)                    |
| Total cholesterol, mg/dL, mean $\pm$ SD       | 175.8 (35.6)                  | 177.6 (33.2)                  |
| HDL-C, mg/dL, mean $\pm$ SD                   | 52.6 (13.9)                   | 53.3 (13.6)                   |
| Triglycerides, mg/dL, mean $\pm$ SD           | 81.3 (60.5)                   | 77.7 (49.3)                   |
| BMI, kg/m <sup>2</sup> , mean $\pm$ SD        | 25.5 (5.9)                    | 25.1 (5.1)                    |
| Waist circumference, cm, mean $\pm$ SD        | 80.5 (12.9)                   | 79.6 (11.9)                   |
| Physical activity score, mean $\pm$ SD        | 373.9 (291.5)                 | 386.3 (287.3)                 |
| Healthy Eating Index, mean $\pm$ SD           | 62.3 (9.8)                    | 62.2 (9.4)                    |
| Smoking status                                |                               |                               |
| Former, n (%)                                 | 192 (12.1%)                   | 433 (14.4%)                   |
| Current, n (%)                                | 601 (37.8%)                   | 757 (25.2%)                   |
| Never, n (%)                                  | 798 (50.2%)                   | 1814 (60.4%)                  |
| Alcohol use                                   |                               |                               |
| Heavy, n (%)                                  | 4 (18.2%)                     | 374 (14.5%)                   |
| Moderate, n (%)                               | 13 (59.1%)                    | 1467 (57.0%)                  |
| Never, n (%)                                  | 5 (22.7%)                     | 732 (28.4%)                   |
| Anti-hypertensive medication, n (%)           | 50 (3.2%)                     | 73 (2.4%)                     |

Abbreviations: BMI, body mass index; HDL-C, high-density lipoprotein cholesterol; SD, standard deviation.

**Supplemental Table 4. Annualized rates of change by BCAA trajectory group in prevalent diabetes analysis.**

|                                                | <b>Low-stable<br/>(n=1,427)</b> | <b>Moderate-stable<br/>(n=1,384)</b> | <b>High-increasing<br/>(n=270)</b> |
|------------------------------------------------|---------------------------------|--------------------------------------|------------------------------------|
| BCAA levels, $\mu\text{mol/L}$ , mean $\pm$ SD |                                 |                                      |                                    |
| Year 2 Examination                             | 323.3 (56.8)                    | 393.5 (61.1)                         | 462.6 (77.4)                       |
| Year 7 Examination                             | 361.2 (51.0)                    | 442.4 (60.0)                         | 535.7 (83.3)                       |
| Year 15 Examination                            | 341.3 (46.8)                    | 423.8 (56.5)                         | 504.2 (75.8)                       |
| Year 20 Examination                            | 344.3 (47.4)                    | 428.1 (54.5)                         | 517.8 (81.6)                       |
| Year 30 Examination                            | 347.4 (53.5)                    | 426.0 (57.1)                         | 535.0 (86.9)                       |
| Annualized BCAA change                         | 0.5 (3.3)                       | 0.9 (4.0)                            | 2.3 (6.7)                          |

Abbreviations: BCAA, branched chain amino acid; SD, standard deviation.

**Supplemental Table 5. Annualized rates of change by BCAA trajectory group in incident diabetes analysis.**

|                                                | <b>Low-stable<br/>(n=1,247)</b> | <b>Moderate-stable<br/>(n=1,196)</b> | <b>High-increasing<br/>(n=312)</b> |
|------------------------------------------------|---------------------------------|--------------------------------------|------------------------------------|
| BCAA levels, $\mu\text{mol/L}$ , mean $\pm$ SD |                                 |                                      |                                    |
| Year 2 Examination                             | 314.6 (51.2)                    | 392.9 (56.5)                         | 450.6 (81.9)                       |
| Year 7 Examination                             | 356.2 (48.3)                    | 432.5 (50.9)                         | 520.5 (76.0)                       |
| Year 15 Examination                            | 338.7 (47.0)                    | 411.3 (52.0)                         | 493.2 (69.3)                       |
| Year 20 Examination                            | 341.0 (46.5)                    | 416.7 (51.7)                         | 497.4 (77.9)                       |
| Annualized BCAA change                         | 0.8 (4.4)                       | 0.9 (5.0)                            | 1.9 (7.8)                          |

Abbreviations: BCAA, branched chain amino acid; SD, standard deviation.

**Supplemental Table 6. Participants with available BCAA measurements by examination  
Year.**

| <b>Examination</b> | <b>Number of participants</b> |
|--------------------|-------------------------------|
| Year 2             | 2334                          |
| Year 7             | 2920                          |
| Year 15            | 2798                          |
| Year 20            | 3054                          |
| Year 30            | 2562                          |
